# Supplementary material for: Puccinia Spore Concentrations in Relation to Weather Factors and Phenological Development of a Wheat Crop in Northwestern Spain
Source: MDPI journal article supplement (doi:10.3390/agriculture13081637), 2023-08-19
Supplement: s1 [file s1]

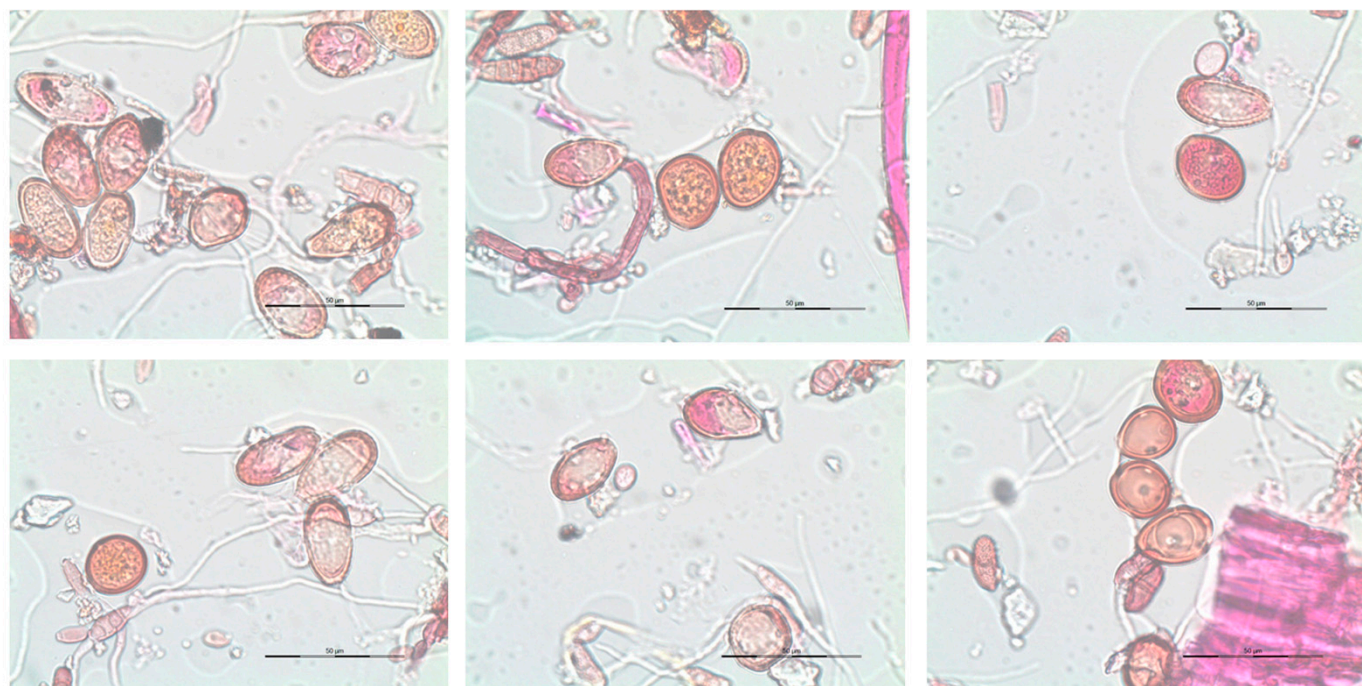

**Figure S1:** Photomicrographs of *Puccinia* uredinospores quantified in some of the aerobiological samples collected with the Lanzoni VPPS 2010 sampler during the study period in the wheat crop of A Limia, Ourense, Spain. 400X magnification.

**Table S1.** Spearman's correlation between *Puccinia* concentration and weather parameters, maximum, minimum and average temperatures (Max T, Min T, Avg T °C), dew point (°C), relative humidity (RH%), accumulated rain (mm), wind speed (m/s), sun hours (h) and, leaf moisture (h); during the same day and the 1, 2 and 3 previous days in each phenological stage (S0: Germination; S1: Leaf development (main stem); S2: Tillering; S3: Steam elongation; S4: Booting; S5: Inflorescence emergence, heading; S6: Flowering anthesis; S7: Development of fruit; S8: Ripening of fruits and seeds; S9: Senescence). Signification level in bold type ( $p < 0.05$ ).

| <i>Puccinia</i> | 2021   |        |        |        |               |               |               |               |              |        | Total        |
|-----------------|--------|--------|--------|--------|---------------|---------------|---------------|---------------|--------------|--------|--------------|
|                 | S-0    | S-1    | S-2    | S-3    | S-4           | S-5           | S-6           | S-7           | S-8          | S-9    |              |
| MaxT            | 0.036  | -0.275 | 0.405  | -0.071 | -0.036        | -0.036        | 0.325         | 0.486         | 0.147        | -0.800 | <b>0.296</b> |
| MaxT_1          | 0.164  | -0.120 | 0.262  | 0.179  | -0.288        | 0.643         | -0.228        | 0.305         | 0.432        | -0.400 | <b>0.340</b> |
| MaxT_2          | -0.236 | 0.096  | 0.667  | -0.643 | -0.613        | <b>0.821</b>  | -0.154        | -0.090        | <b>0.544</b> | -1.000 | <b>0.310</b> |
| MaxT_3          | 0.091  | 0.407  | 0.095  | -0.107 | -0.750        | 0.179         | -0.297        | -0.266        | 0.150        | -0.800 | 0.191        |
| MinT            | 0.270  | 0.156  | -0.262 | 0.250  | -0.714        | 0.613         | <b>-0.555</b> | 0.319         | -0.053       | 0.600  | <b>0.268</b> |
| MinT_1          | -0.450 | -0.383 | -0.310 | -0.607 | -0.679        | -0.198        | -0.476        | -0.004        | 0.148        | -0.800 | 0.118        |
| MinT_2          | 0.418  | -0.108 | -0.357 | 0.179  | <b>-0.929</b> | -0.631        | 0.019         | -0.167        | 0.391        | -0.800 | 0.204        |
| MinT_3          | 0.450  | 0.228  | 0.262  | -0.571 | -0.541        | <b>-0.857</b> | 0.231         | -0.348        | 0.338        | -0.600 | <b>0.277</b> |
| AvgT            | 0.577  | -0.323 | 0.228  | 0.214  | -0.487        | 0.214         | 0.152         | 0.477         | 0.120        | -0.949 | <b>0.389</b> |
| AvgT_1          | -0.198 | -0.228 | 0.240  | -0.393 | -0.500        | 0.750         | <b>-0.600</b> | 0.270         | 0.502        | -0.800 | <b>0.388</b> |
| AvgT_2          | 0.144  | -0.060 | 0.539  | -0.071 | -0.786        | 0.577         | -0.234        | -0.147        | <b>0.731</b> | -0.800 | <b>0.379</b> |
| AvgT_3          | 0.126  | 0.479  | 0.275  | -0.541 | -0.857        | -0.288        | -0.206        | -0.301        | 0.510        | -0.800 | <b>0.267</b> |
| DewP            | 0.541  | -0.168 | 0.143  | 0.126  | -0.714        | 0.071         | -0.033        | 0.121         | 0.175        | 0.200  | <b>0.243</b> |
| DewP_1          | -0.378 | -0.024 | 0.167  | -0.214 | -0.750        | <b>0.857</b>  | <b>-0.560</b> | 0.007         | 0.366        | -0.200 | <b>0.239</b> |
| DewP_2          | 0.595  | 0.108  | 0.429  | 0.000  | <b>-1.000</b> | -0.107        | -0.280        | -0.108        | <b>0.643</b> | -1.000 | <b>0.236</b> |
| DewP_3          | 0.144  | 0.527  | 0.000  | -0.714 | <b>-0.739</b> | -0.429        | 0.005         | -0.253        | <b>0.631</b> | -0.800 | <b>0.249</b> |
| RH              | 0.414  | 0.349  | -0.071 | 0.000  | -0.509        | 0.000         | -0.225        | <b>-0.631</b> | -0.050       | 0.632  | -0.175       |

|             |              |        |              |        |               |               |               |        |        |        |               |
|-------------|--------------|--------|--------------|--------|---------------|---------------|---------------|--------|--------|--------|---------------|
| RH_1        | -0.162       | 0.030  | -0.060       | 0.056  | -0.734        | -0.541        | 0.030         | -0.155 | -0.169 | 0.894  | -0.161        |
| RH_2        | 0.427        | 0.048  | 0.144        | -0.206 | -0.218        | <b>-0.847</b> | -0.022        | 0.323  | 0.054  | -0.211 | -0.161        |
| RH_3        | 0.318        | -0.114 | -0.180       | -0.655 | 0.382         | -0.200        | 0.207         | 0.122  | 0.404  | 0.316  | -0.077        |
| Rain        | -0.249       | 0.192  | 0.412        | 0.252  | -0.750        |               | 0.309         |        | -0.295 |        | <b>-0.370</b> |
| Rain_1      | -0.486       | -0.069 | 0.082        | -0.259 | <b>-0.757</b> |               | 0.154         |        | -0.109 |        | <b>-0.420</b> |
| Rain_2      | 0.449        | -0.064 | 0.247        | -0.197 | -0.523        | -0.612        | -0.309        |        | -0.169 |        | <b>-0.412</b> |
| Rain_3      | -0.236       | 0.263  | -0.577       | -0.394 | -0.324        | -0.401        | -0.154        |        | 0.019  |        | <b>-0.446</b> |
| WS          | 0.685        | 0.383  | -0.190       | 0.536  | 0.393         | 0.607         | -0.511        | 0.108  | 0.339  | 0.949  | 0.011         |
| WS_1        | -0.667       | 0.108  | 0.072        | -0.500 | 0.750         | -0.703        | -0.269        | -0.240 | 0.183  | -0.211 | -0.206        |
| WS_2        | 0.270        | -0.503 | -0.228       | 0.250  | 0.714         | <b>-0.775</b> | 0.022         | 0.037  | 0.015  | -0.949 | -0.190        |
| WS_3        | <b>0.865</b> | 0.120  | -0.277       | -0.487 | 0.679         | -0.286        | 0.341         | 0.367  | -0.452 | 0.000  | -0.157        |
| SunH        | -0.252       | -0.311 | -0.431       | -0.143 | 0.429         | 0.306         | 0.122         | 0.489  | 0.159  | -1.000 | 0.060         |
| SunH_1      | 0.270        | 0.000  | 0.590        | 0.234  | 0.286         | 0.360         | <b>-0.567</b> | 0.106  | 0.236  | -0.800 | 0.098         |
| SunH_2      | -0.559       | -0.371 | 0.506        | -0.432 | -0.071        | 0.631         | 0.132         | -0.097 | 0.101  | -0.600 | 0.103         |
| SunH_3      | 0.090        | 0.263  | 0.390        | 0.595  | -0.464        | 0.321         | 0.138         | -0.156 | -0.463 | 0.800  | 0.062         |
| LeafMoist   | 0.118        | 0.185  | 0.518        | 0.571  | -0.429        | 0.214         | 0.330         | -0.328 | -0.205 | 0.800  | 0.054         |
| LeafMoist_1 | -0.396       | 0.148  | <b>0.786</b> | 0.000  | -0.286        | <b>0.919</b>  | 0.181         | 0.031  | 0.104  | 0.600  | 0.142         |
| LeafMoist_2 | 0.523        | 0.432  | <b>0.714</b> | -0.214 | -0.214        | -0.214        | -0.214        | 0.249  | 0.039  | -0.800 | 0.068         |
| LeafMoist_3 | -0.378       | 0.000  | 0.143        | -0.071 | -0.393        | -0.536        | <b>-0.593</b> | -0.236 | 0.110  | -0.800 | -0.053        |

## 2022

| <i>Puccinia</i> | S-0           | S-1           | S-2           | S-3           | S-4           | S-5    | S-6    | S-7    | S-8           | S-9          | Total         |
|-----------------|---------------|---------------|---------------|---------------|---------------|--------|--------|--------|---------------|--------------|---------------|
| MaxT            | 0.711         | 0.704         | <b>0.826</b>  | 0.324         | 0.464         | 0.321  | 0.072  | -0.134 | -0.144        | 0.535        | <b>0.413</b>  |
| MaxT_1          | <b>0.842</b>  | 0.482         | <b>0.575</b>  | 0.450         | 0.464         | 0.143  | 0.342  | 0.181  | -0.378        | 0.214        | <b>0.365</b>  |
| MaxT_2          | 0.318         | <b>0.037</b>  | <b>0.558</b>  | 0.414         | 0.058         | -0.464 | 0.090  | 0.044  | -0.432        | 0.099        | <b>0.227</b>  |
| MaxT_3          | -0.299        | -0.593        | <b>0.647</b>  | 0.126         | -0.406        | -0.071 | 0.090  | 0.073  | -0.721        | 0.211        | 0.130         |
| MinT            | 0.255         | -0.556        | <b>0.575</b>  | 0.234         | -0.493        | -0.414 | 0.018  | 0.307  | -0.288        | 0.208        | <b>0.221</b>  |
| MinT_1          | -0.085        | -0.445        | <b>0.827</b>  | <b>0.918</b>  | -0.174        | -0.036 | -0.649 | 0.118  | 0.126         | 0.457        | <b>0.231</b>  |
| MinT_2          | -0.604        | -0.815        | <b>0.792</b>  | 0.336         | <b>-0.812</b> | 0.357  | -0.162 | -0.013 | -0.018        | 0.116        | 0.106         |
| MinT_3          | -0.019        | -0.482        | 0.432         | -0.324        | 0.058         | 0.357  | 0.109  | -0.029 | <b>-0.775</b> | -0.465       | -0.054        |
| AvgT            | <b>0.898</b>  | <b>0.778</b>  | <b>0.813</b>  | 0.180         | 0.551         | 0.036  | 0.090  | -0.057 | -0.198        | <b>0.633</b> | <b>0.428</b>  |
| AvgT_1          | 0.748         | 0.408         | <b>0.771</b>  | 0.631         | -0.261        | 0.036  | 0.090  | 0.224  | -0.198        | 0.411        | <b>0.388</b>  |
| AvgT_2          | 0.281         | -0.111        | <b>0.679</b>  | 0.270         | -0.232        | -0.143 | 0.182  | 0.081  | -0.364        | 0.321        | <b>0.240</b>  |
| AvgT_3          | -0.415        | -0.593        | <b>0.675</b>  | 0.109         | 0.000         | -0.107 | 0.073  | -0.040 | -0.700        | 0.149        | 0.122         |
| DewP            | 0.599         | -0.222        | <b>0.738</b>  | 0.180         | -0.058        | -0.306 | 0.396  | 0.135  | 0.180         | 0.254        | <b>0.266</b>  |
| DewP_1          | 0.150         | <b>-0.964</b> | <b>0.846</b>  | <b>0.775</b>  | -0.279        | -0.216 | -0.234 | 0.282  | 0.487         | 0.501        | <b>0.247</b>  |
| DewP_2          | -0.561        | -0.111        | <b>0.755</b>  | 0.414         | -0.309        | 0.143  | -0.216 | -0.024 | -0.054        | 0.279        | 0.128         |
| DewP_3          | -0.393        | -0.334        | <b>0.570</b>  | -0.288        | -0.426        | 0.464  | -0.327 | 0.045  | -0.591        | -0.192       | -0.013        |
| RH              | -0.510        | -0.630        | <b>-0.615</b> | -0.252        | -0.485        | -0.393 | 0.173  | 0.229  | 0.330         | -0.404       | <b>-0.379</b> |
| RH_1            | <b>-0.850</b> | <b>-0.815</b> | -0.163        | -0.577        | -0.493        | -0.214 | -0.180 | -0.092 | 0.505         | -0.137       | <b>-0.404</b> |
| RH_2            | -0.472        | -0.111        | -0.100        | -0.270        | -0.582        | 0.685  | -0.072 | -0.155 | 0.595         | -0.075       | <b>-0.265</b> |
| RH_3            | 0.330         | 0.371         | -0.416        | -0.455        | -0.132        | 0.342  | -0.216 | -0.083 | 0.179         | -0.198       | -0.201        |
| Rain            | -0.403        | -0.693        | <b>-0.575</b> | -0.255        | -0.223        | -0.074 |        | 0.276  |               | -0.155       | <b>-0.281</b> |
| Rain_1          | <b>-0.867</b> | -0.635        | <b>-0.642</b> | <b>-0.873</b> | -0.462        | -0.020 | 0.412  | -0.310 |               | -0.309       | <b>-0.362</b> |
| Rain_2          | -0.653        | 0.212         | <b>-0.680</b> | -0.019        | -0.471        | 0.401  | -0.270 | -0.241 |               | -0.232       | <b>-0.248</b> |
| Rain_3          | -0.428        | 0.324         | <b>-0.545</b> | 0.179         | -0.203        | 0.408  | -0.378 | 0.103  |               | -0.077       | -0.139        |
| WS              | -0.674        | -0.111        | 0.177         | 0.355         | 0.029         | 0.393  | 0.009  | 0.387  | 0.245         | 0.033        | <b>0.215</b>  |
| WS_1            | -0.655        | -0.334        | 0.163         | <b>0.891</b>  | -0.232        | -0.036 | -0.136 | 0.034  | 0.591         | 0.057        | 0.131         |
| WS_2            | -0.206        | -0.148        | 0.141         | 0.450         | 0.290         | 0.179  | -0.445 | 0.100  | <b>0.793</b>  | <b>0.560</b> | 0.119         |
| WS_3            | 0.449         | 0.259         | 0.051         | -0.162        | 0.485         | 0.214  | -0.073 | 0.185  | -0.018        | 0.265        | 0.045         |
| SunH            | -0.356        | 0.654         | <b>0.685</b>  | 0.487         | 0.609         | 0.464  | -0.239 | -0.248 | 0.100         | 0.463        | <b>0.354</b>  |
| SunH_1          | 0.524         | 0.692         | 0.326         | 0.667         | 0.174         | 0.214  | 0.308  | -0.395 | -0.173        | -0.104       | <b>0.306</b>  |

|             |              |              |               |        |              |        |        |        |        |        |               |
|-------------|--------------|--------------|---------------|--------|--------------|--------|--------|--------|--------|--------|---------------|
| SunH_2      | <b>0.842</b> | 0.385        | 0.353         | -0.090 | <b>0.812</b> | -0.714 | 0.219  | 0.237  | -0.482 | 0.077  | <b>0.245</b>  |
| SunH_3      | 0.318        | -0.231       | <b>0.588</b>  | -0.144 | 0.116        | -0.250 | 0.112  | -0.006 | -0.645 | 0.191  | 0.179         |
| LeafMoist   | 0.430        | -0.445       | <b>-0.770</b> | -0.667 | 0.406        | -0.162 | -0.541 | -0.220 | 0.667  | -0.288 | <b>-0.338</b> |
| LeafMoist_1 | 0.374        | -0.408       | <b>-0.614</b> | -0.613 | -0.058       | -0.396 | 0.739  | -0.200 | 0.018  | -0.467 | <b>-0.252</b> |
| LeafMoist_2 | 0.151        | <b>0.852</b> | <b>-0.663</b> | 0.090  | 0.145        | 0.162  | 0.396  | 0.232  | -0.180 | -0.419 | -0.132        |
| LeafMoist_3 | -0.500       | 0.037        | -0.508        | 0.360  | -0.232       | -0.072 | -0.198 | 0.035  | 0.396  | 0.164  | -0.078        |

**Table S2.** Consecutive days in which the meteorological conditions of the Rodriguez-Moreno et al. [10] model is met during our study period. \* Nocturnal temperature of the Rodriguez-Moreno et al. [10] model.

| Year | Days | Hours        |             |
|------|------|--------------|-------------|
|      |      | 20:00–7:00 * | 23:00–7:00  |
| 2021 | 2    | 5/08–7/08    | 14/05–16/05 |
|      |      | 4/07–6/07    | 31/05–2/06  |
|      |      | 20/6–22/06   | 20/06–22/06 |
|      |      | 31/5–2/6     | 10/07–12/07 |
|      |      | 14/05–16/05  | 25/7–27/07  |
|      |      |              | 5/08–7/08   |
|      | 3    | 16/06–19/06  |             |
| 2022 | 4    |              | 2/07–6/07   |
|      |      |              | 19/07–23/07 |
|      | 7    |              | 12/06–19/06 |
|      | 2    | 5/06–7/06    | 17/06–19/06 |
|      |      |              | 21/07–23/07 |
|      |      |              | 28/07–30/07 |
|      |      |              | 4/08–6/08   |
|      | 3    | 29/05–1/06   | 10/08–12/08 |
|      |      |              | 20/05–23/05 |
|      |      |              | 29/05–1/06  |
|      |      |              | 2/07–7/07   |
|      | 8    |              | 5/06–13/06  |
